# Supplementary material for: Estimating precipitation susceptibility in warm marine clouds using multi-sensor aerosol and cloud products from A-Train satellites
Source: Copernicus journal article supplement (doi:10.5194/acp-2017-887), 2017-10-12
Supplement: Supplementary file [file acp-2017-887-AC2-supplement.pdf]

**We are grateful to the evaluations from the reviewers, which have allowed us to clarify and improve the manuscript. Below we addressed the reviewer comments, with the reviewer comments in italic and our response in bold.**

***Anonymous Referee #2***

*Received and published: 11 November 2017*

*In various studies, the precipitation susceptibility metric has been used to quantify the effect of aerosols on the precipitation in both models and observations and to indicate the strength of the cloud lifetime effect. The present article examines how observationally-based estimates of the precipitation susceptibility metric vary depending on the various dataset and analysis choices. Previous attempts to provide an observational constraint on the precipitation susceptibility metric have led to different strengths in susceptibility and also in different behaviors of the susceptibility. The study contributes to the existing literature by attempting to reconcile those differences by examining a wide range of data and analysis choices in the same framework, which might help answer why different studies have arrived at different susceptibility estimates. The authors examine the sensitivity of the susceptibility metric to the choice of aerosol proxy, precipitation characteristic (intensity, probability of precipitation (POP), or mean precipitation), stability regime, liquid water path retrieval, precipitation retrieval, and precipitation threshold. After examining the whole range of sensitivities, the authors conclude that SPOP has the least amount of spread that arises from the choice of liquid water path and precipitation data product. The authors also find strong sensitivities in the choice of stability regime and in whether aerosol index (AI) or the cloud droplet number concentration (CDNC) is used as the aerosol proxy.*

*The study is a substantial contribution to the existing literature by providing a comprehensive examination of the possible source of discrepancies that can arise when trying to estimate the precipitation susceptibility based on satellite retrievals. The manuscript methodically goes through the different choices that can be made, and assesses their impact on the value and behavior of the metric. There are a couple issues with the paper that I would like to see the authors address. First, the authors mention in the introduction of how estimates from Wang et al. (2012), Terai et al. (2015), and Michibata et al. (2016) differ in the magnitude of the SPOP metric. Although it appears that the use of AI or CDNC is the largest source of the discrepancy, I expected to see the authors discuss more thoroughly how the effect of the choice of aerosol proxy compares with effect of the choice of precipitation dataset and threshold. I had also expected a similar discussion that folds in the results from Sorroshtiaan et al. (2009) on both the magnitude of the susceptibility, as well as the behavior of the susceptibility. Second, statistical confidence limits to the susceptibilities should be provided to determine how the statistical uncertainties compare with the other dataset/methodology uncertainties that are*

examined in the study. The confidence intervals would help inform whether the choice of datasets significantly change the susceptibility estimates or not. Overall, the manuscript has a clear scientific question, uses analyses that address the question, and is well organized. I do not consider the main issues that I have to be major. Therefore, I recommend that the manuscript be published after the following comments and issues have been addressed.

*Main comments and issues:*

1. The uncertainties in the susceptibility estimates should be reported in all the figures and graphs. The 95% confidence intervals can be calculated from the standard deviation of the regression or using bootstrapping techniques. The statistical uncertainties will help the author substantiate some of the statements within the manuscript that say whether or not various choices significantly change the susceptibilities.

**The error bars with 95% confidence intervals are now added to all the susceptibilities figures except Fig. 10 and Fig. 11. Given that each panel of Fig. 10 and Fig. 11 includes six susceptibility curves, these figures would be not clear and messy if error bars are added. The error bars can be found for global mean values for these cases in Fig. 13.**

**We thank the reviewer for this excellent suggestion! Adding the statistical uncertainties indeed helps us substantiate some of our statements in the manuscript. For instance, we can state with confidence that  $S_{POP}$  estimates are not significantly influenced by LWP products, while  $S_I$  estimates are, as shown in Fig. 5 in the revised manuscript. On the other hand, the differences of  $d\ln CDNC/d\ln AI$  between different stability regimes are not significant (Fig. 3). We also find that almost all of mean  $S_{I\_CDNC}$  is significantly negative regardless of stability regimes (Fig. 13).**

2. Given that the main purpose of the study is to examine how the various choices have led to differences in the susceptibility that are reported in the literature, the authors should provide more discussion on how this study helps to reconcile existing differences. In particular, the authors should do their best to identify likely reasons why the estimates in the previous studies have differed (if they do). For example, there are differences in the magnitude of the susceptibility (e.g., Wang et al., 2012 versus Terai et al., 2015). There are also differences in the behavior of susceptibility (monotonic decrease versus increase and then decrease).

**We have provided more discussion on the differences in both magnitude and behavior of susceptibility in previous studies in the second paragraph of the Section 4 (Discussion). Now the text reads "Our results may help to reconcile some of the differences in previous estimates of precipitation susceptibility. For example, our results show that  $S_{X\_AI} \approx 0.3 S_{X\_CDNC}$ , (Table 3 and Fig. 1), which explains why  $S_{POP\_CDNC}$  in Terai et al. (2015) is much larger than  $S_{POP\_AI}$  in Wang et al., (2012). Previous studies are also different**

in how precipitation susceptibility varies with increasing LWP. Our results show that  $S_i$  generally increases with LWP at low and moderate LWP and then decreases with increasing LWP at moderate and high LWP, consistent with results from Feingold et al., (2013), Michibata et al., (2016) and Jung et al., (2016). The monotonic increase of  $S_{I\_CDNC}$  with increasing LWP in Terai et al., (2015) is mainly because that the LWP range in their study is relatively narrow (from 0 to  $\sim 400 \text{ g m}^{-2}$ ) and our results suggest that when the upper bound of LWP is extended to  $\sim 800 \text{ g m}^{-2}$ , the “descending branch” ( $S$  decreases with increasing LWP) noted in Feingold et al. (2013) appears, though the exact LWP value where  $S_{I\_CDNC}$  peaks depend on LWP and rain products used as well as the rainfall threshold choices.”

*3. The authors seem to argue for the use of SPOP as a metric to quantify aerosol-cloud-precipitation interactions due to SPOP having a smaller range of possible values, based on different LWP and precipitation rate retrievals (Fig. 14). There is less discussion on the advantages and disadvantages of using CDNC or AI as a metric and also a lack of discussion on how the threshold (rain vs. drizzle) can significantly change SPOP values. Given that the authors have examined a wide range of potential sources that lead to differences in susceptibility estimates, it would be informative for the readers to have the authors synthesize their findings and discuss what should be considered in future attempts to try to observationally constrain precipitation susceptibility or attempts to compare susceptibilities from models and from observations.*

**Thanks for your suggestions! We now made further recommendations on how to better use these metrics to quantify aerosol-cloud-precipitation interactions in models and observations in Section 5, and it reads:**

**“As  $S_{POP}$  demonstrates relatively robust features across different LWP and rain products, this makes it a valuable metric for quantifying aerosol-cloud-precipitation interactions in observations and models. For instance, it would be highly interesting to examine why  $S_{POP}$  strongly depends on atmospheric stability and how well this dependence is represented in a hierarchy of models (e.g., large eddy simulations, cloud resolving models, regional climate models, and global climate models). We also note that  $S_{POP\_CDNC}$  is generally less uncertain compared to  $S_{POP\_AI}$  and that a relatively robust relationship between  $S_{POP\_CDNC}$  and  $S_{POP\_AI}$  exists (i.e.,  $S_{X\_AI} \approx 0.3 S_{X\_CDNC}$ ) (Fig. 13 and Table 3). Given that aerosol retrievals near clouds are still challenging and aerosol-cloud relationships in satellite observations can be affected by aerosol retrieval contaminations from clouds, we recommend to first thoroughly quantify  $S_{POP\_CDNC}$  in observations and models. As  $S_{POP\_CDNC}$  is derived based on CDNC instead of AI,  $S_{POP\_CDNC}$  is also not influenced by wet scavenging. Only after  $S_{POP\_CDNC}$  is thoroughly quantified, we can then combine it with how CDNC depends on AI to better quantify  $S_{POP\_AI}$ .**

On the other hand,  $S_I$  estimates strongly depend on satellite retrieval products. Uncertainties in  $S_I$  estimate are particularly large when  $S_I$  is estimated based on rain samples ( $> 0$  dBZ) rather than drizzle samples ( $> -15$  dBZ). It would then be desirable to use drizzle samples to estimate  $S_I$ . However, satellite retrieval of precipitation rate for drizzle can be highly uncertain. It is therefore recommended to further improve the retrieval accuracy of precipitation rate for drizzle in satellite observations in order to better use satellite estimate of  $S_I$  to quantify aerosol-cloud precipitation interactions. Alternatively, long-term ground and in-situ observations with high accuracy precipitation rate retrievals can be used to provide better estimate  $S_I$  and to further quantify aerosol-cloud-precipitation interactions.”.

Further discussions are added on difference of  $S_{POP}$  and  $S_I$  between rain and drizzle in Section 5 and now the text reads " Our results suggest that onset of drizzle is not as readily suppressed by increases in AI or CDNC in warm clouds as rainfall (i.e.,  $S_{POP}$  is smaller for drizzle than for rain, especially at moderate LWP, Fig. 9). This may partly come from the fact that POP of drizzle is close to 100% at moderate and high LWP regardless of CDNC or AI values (Fig. 7a-d), which makes it insensitive to perturbations in CDNC or AI and results in smaller  $S_{POP}$  at these LWP bins compared with  $S_{POP}$  for rain (Fig. 9). On the other hand, precipitation intensity susceptibility is generally smaller for rain than for drizzle. This is consistent with our expectation that when precipitation intensity increases, accretion contributes more to the production of precipitation, which makes precipitation intensity less sensitive to perturbation in CDNC or AI, as accretion is less dependent on CDNC compared with autoconversion (Feingold et al., 2013; Wood, 2005)"

*Minor Comments:*

1. P2 L3: “Susceptibility is an inherent property of the aerosol-cloud system.” – This is an interesting statement, but it is also vague. Does the statement mean that susceptibility doesn’t change with cloud condition? Or aerosol condition? Should they be robust to differences in measurement platform, etc.?

**We agree this statement is indeed vague, and this statement is now removed in the revised manuscript.**

2. P5 L32: “... selected in close proximity of clouds pixels.” What exact criteria is used to determine how close aerosol retrievals must be to be used in the study?

**Exact criteria for collocation are added in Sec 2.1. Now the text reads “... MODIS cloud product and CPR radar reflectivity observations used in this study are both provided from the Caltrack datasets, which resample observations from many sensors under CALIOP subtrack with the horizontal resolution of 5km (see the website of**

<http://www.icare.univ-lille1.fr/projects/calxtract/products> for more information). For other aerosol and cloud products, including MODIS/CALIOP aerosol products and AMSR-E cloud products, these are further collocated into the CALIOP subtracks in the Caltrack dataset. For each CALIOP subtrack, the closest aerosol and cloud retrieval samples within one-degree grid box ( $1^{\circ}\times 1^{\circ}$ ) centered at this subtrack are chosen. To reduce the uncertainty in cloud retrievals, only samples where MODIS cloud fraction is equal to 100% are selected”.

3. P6 L23: replace “significant” with “significantly”

**Done.**

4. P6 L25: *What is the spatial resolution of the precipitation data? Is it at the footprint level? In general, how are pairs of LWP, precipitation rate, and aerosol proxy combined? Are they all combined at the footprint of the precipitation rate? Is the coarsest footprint used for the comparison?*

**The horizontal resolution of all precipitation data used in the paper is at a footprint level with 1.3km cross track and 1.7 km along track except CPR radar reflectivity observations (i.e., 2B-GEOPROF product collocated to CALIOP subtrack with 5km resolution). The resolution of different products can be seen in Table2. Overall, MODIS LWP, precipitation rate from 2B-GEOPROF and aerosol proxy are combined to CALIOP subtrack since CALIOP aerosol product, MODIS cloud product and CPR 2B-GEOPROF product used in the paper are all provided from Caltrack datasets. For other retrieval products, including MODIS/CALIOP aerosol products and AMSR-E cloud products, these are further collocated into the CALIOP subtracks in the Caltrack dataset. For each CALIOP subtrack, the closest aerosol and cloud retrieval samples within one-degree grid box ( $1^{\circ}\times 1^{\circ}$ ) centered at this subtrack are chosen. More details can be found in the first paragraph of Sec 2.1 in the revised manuscript.**

5. P7 L15: *Provide some indication of statistical uncertainty in the estimates in Fig. 1. See main comment 1. Also, it would be informative to indicate the 0 value with a dotted or gray line, because values below that line will indicate that increases in aerosols/cloud droplets lead to more precipitation.*

**We have added error bars with 95% confidence intervals and zeroline in the Fig. 1.**

6. P7 L22-24: *The turning point is very slight. The confidence intervals will be helpful in determining how significant the peak is.*

**Thanks! We now added error bars. The peak is not significant anymore after the error bars are added. But  $S_{LCDNC}$  would decrease distinctly after the peak if the upper bound of LWP and the number of LWP bins both increased (see figure below). The sentence is now reformulated to**

"Although the  $S_{L\_CDNC}$  peak (around 0.6 with LWP 350  $\text{gm}^{-2}$ ) is not significant in Fig. 1b,  $S_{L\_CDNC}$  would decrease distinctly after the peak if the upper bound of LWP and the number of LWP bins both increase (not shown). This turning point may correspond to conversion process shifting from the autoconversion to accretion regime (Michibata et al., 2016)."

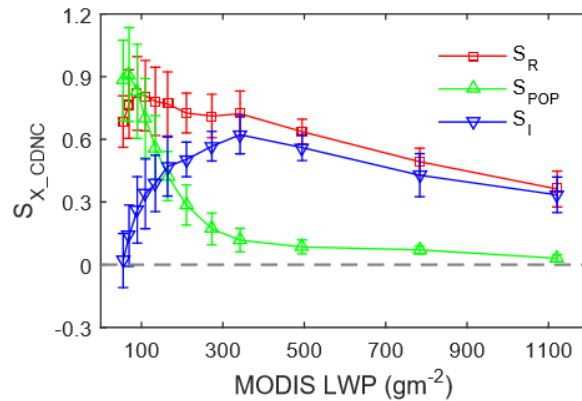

Same as the Fig. 1b but with increase in the upper boundary of LWP and the number of LWP bins

7. P7 L29: To show that the fluctuations in the mean are small compared to noise, the interquartile range (between 25th percentile and 75th percentile) can be shown.

**Done. The interquartile range is now added to Fig. 2.**

8. P7 L29: Also, because the AI vs. CDNC relationship takes the form  $d \ln(\text{CDNC})/d \ln(\text{AI})$  and because it looks like the AI has a lognormal distribution, it might be better to plot the x-axis in log-scale.

**Done. Now the x-axis in Fig. 2 is in log-scale.**

9. P8 L4-5: The differences in  $d \ln \text{CDNC}/d \ln \text{AI}$  between the different stability regimes are interesting, in particular, the lack of sensitivity (or negative sensitivity at high LWPs). Are these differences significant? Do the authors have an explanation as to why the stability affects the sensitivity?

**We now add error bars to Fig. 3, and now the differences in  $d \ln \text{CDNC}/d \ln \text{AI}$  between the different stability regimes and negative sensitivity at high LWP are both not significant anymore.**

10. P8 L16: The subtle differences in Fig 4 are hard to see because of the large y-axis range. I can understand the choice to try to keep the same axis range across different figures, but in this case, I would suggest narrowing the range to allow the reader to discern any differences.

**We have narrowed the range of y-axis and also added a zeroline to this figure in the revised manuscript.**

11. P8 L26-28: *Is there a reason why we would rely more heavily on and prefer MODIS AI rather than CALIPSO AI?*

**This is mainly because MODIS AI has been widely used in previous studies for examining aerosol-cloud-precipitation interactions. What is more, Costantino and Bréon, (2010) shown that AOD estimate from CALIPSO product was very noisy and less reliable than the equivalent parameter from MODIS. The 2D vs. 1D sampling is a likely reason for the MODIS AI being a bit smoother than the CALIPSO AI.**

12. P9 L2-7: *This is one case where confidence intervals can show that the SPOP estimates are not significantly affected by the choice of LWP retrievals, whereas the SI and SR estimate are significantly affected.*

**Thanks a lot for this excellent suggestion! After adding error bars to Fig.5, it indeed shows the discrepancies in S<sub>POP</sub> between MODIS and AMSR-E LWP are not significant. We have added this sentence to the first paragraph in Sec 3.3.**

13. P9 L26: *Data is plural, so it should be "... when data are binned..."*

**Corrected.**

14. P10 L11: *Although the axis labels show this, the figure caption to Figure 9 should indicate the difference between the top row and the bottom row.*

**We have clarified this in the caption of Fig. 9.**

15. P10 L26-28: *What is the impact on SR if SPOP increases and SI decreases with increases in the threshold?*

**S<sub>R</sub> is indeed not affected by the rainfall definition since mean rain rate for any given LWP/CDNC or LWP/AI bin is calculated for both rainy and non-rainy clouds, and does not depend on rainfall thresholds used to define a rain event. We have added this sentence to the third paragraph in Sec 3.4 and it reads "By contrast, S<sub>R</sub> is not affected by the rainfall definition since the mean rain rate R for a given LWP/CDNC or LWP/AI bin is calculated based on both rainy and non-rainy clouds and does not depend on rainfall thresholds (not shown)."**

16. P10 L31: *"more significant" should be replaced with "larger", because significant has a particular meaning in the literature (statistical significance), and to state more significant would require examining the confidence intervals.*

**Done.**

17. P11 L28: *"sigh" should be replaced by "sign"*

**Done.**

18. P14 L5: *Insert "by increases in AI or CDNC" between "readily suppressed" and*

“in warm clouds”

Done.

19. P14 L5-6: Taken at face value, this statement is counterintuitive, isn't it? Wouldn't we expect rainfall, which is more dependent on accretion than on autoconversion, to have a weaker dependence to CDNC?

The above expectation is consistent with how  $S_i$  changes with rainfall thresholds. When the rainfall threshold increases, it shifts the production of rain from autoconversion to accretion, which reduces precipitation intensity susceptibility. As for precipitation frequency susceptibility, it depends on how often precipitation frequency reaches its upper limit, 100%. As the rainfall threshold decreases from 0 dBZ to -15 dBZ, POP for drizzle is close to 100% at intermediate and high LWP as shown in the figure below, which make it insensitive to perturbation in CDNC or AI at intermediate and high LWP, resulting in much smaller  $S_{POP}$  at these LWP bins as shown in Fig. 9 in the main text. We now added this discussion to the third paragraph in Sec.5. Now the text reads "Our results suggest that onset of drizzle is not as readily suppressed by increases in AI or CDNC in warm clouds as rainfall (i.e.,  $S_{POP}$  is smaller for drizzle than for rain, especially at moderate LWP, Fig. 9). This may partly come from the fact that POP of drizzle is close to 100% at moderate and high LWP regardless of CDNC or AI values (Fig. 7a-d), which makes it insensitive to perturbations in CDNC or AI and results in smaller  $S_{POP}$  at moderate and high LWP bins compared with  $S_{POP}$  for rain (Fig. 9). On the other hand, precipitation intensity susceptibility is generally smaller for rain than for drizzle. This is consistent with our expectation that when precipitation intensity increases, accretion contributes more to the production of precipitation, which makes precipitation intensity less sensitive to perturbation in CDNC or AI, as accretion is less dependent on CDNC compared with autoconversion (Feingold et al., 2013; Wood, 2005).".

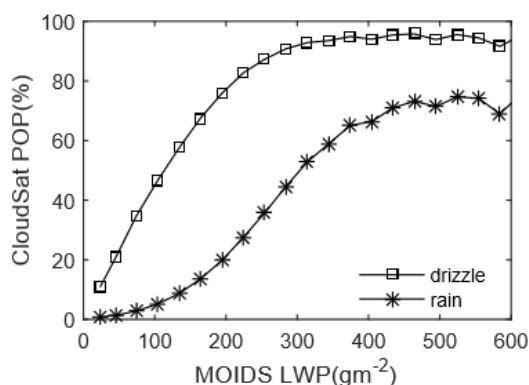

Probability of precipitation as a function of MODIS LWP and its breakdown into drizzle (>0.14 mm d<sup>-1</sup>) and rain (>2 mm d<sup>-1</sup>)

20. P14 L14: Replace “value” with “values”



**Done.**

*21. P14 L14-18: Are these results consistent with existing conceptual frameworks (such as those based on LES) on how stability affects aerosol-cloud-precipitation interactions? Are there LES studies that have addressed how stability might affect susceptibility?*

**The pattern of  $S_{POP\_AI}$  under different stability conditions from our paper (Fig. 13b and Fig. 13f) is consistent with the findings of L'Ecuyer et al., (2009). In addition, Terai et al., (2015) found maximum  $S_{POP\_CDNC}$  occurred in regions where stable regime is predominant. These satellite-based studies, however, did not provide physical interpretations of such results. Lebo and Feingold (2014) calculated precipitation susceptibility for stratocumulus and trade wind cumulus using large-eddy simulations(LES) and included an overview of precipitation susceptibility estimates in the literature based on LES. However, their study focus on the relationship between precipitation susceptibility and cloud water response to aerosol perturbations, and did not examine how precipitation susceptibility might be different for clouds under different cloud regimes. We now added this discussion in the revised manuscript and calls further efforts to understand this difference, especially for  $S_{POP}$  in the Section 5.**

**References:**

Boucher, O., Randall, D., Artaxo, P., Bretherton, C., Feingold, G., Forster, P., Kerminen, V.-M., Kondo, Y., Liao, H., Lohmann, U., Rasch, P., Satheesh, S. K., Sherwood, S., Stevens, B., and Zhang, X. Y.: Clouds and Aerosols, in: Climate Change 2013: The Physical Science Basis. Contribution of Working Group I to the Fifth Assessment Report of the Intergovernmental Panel on Climate Change, edited by: Stocker, T. F., Qin, D., Plattner, G.-K., Tignor, M., Allen, S. K., Boschung, J., Nauels, A., Xia, Y., Bex V., and Midgley, P. M., Cambridge University Press, Cambridge, United Kingdom and New York, NY, USA, 2013.

Albrecht, B. A.: Aerosols, cloud microphysics, and fractional cloudiness, *Science* (80-. ), 245(4923), 1227–1230, doi:10.1126/science.245.4923.1227, 1989.

Cho, H.-M., Zhang, Z., Meyer, K., Lebsock, M., Platnick, S., Ackerman, A. S., Di Girolamo, L., C.-Labonnote, L., Cornet, C., Riedi, J. and Holz, R. E.: Frequency and causes of failed MODIS cloud property retrievals for liquid phase clouds over global oceans, *J. Geophys. Res. Atmos.*, 120(9), 4132–4154, doi:10.1002/2015JD023161, 2015.

Christensen, M. W., Neubauer, D., Poulsen, C., Thomas, G., McGarragh, G., Povey, A. C., Proud, S. and Grainger, R. G.: Unveiling aerosol-cloud interactions Part 1: Cloud contamination in satellite products enhances the aerosol indirect forcing

estimate, *Atmos. Chem. Phys. Discuss.*, 20(May), 1–21, doi:10.5194/acp-2017-450, 2017.

Duong, H. T., Sorooshian, A. and Feingold, G.: Investigating potential biases in observed and modeled metrics of aerosol-cloud-precipitation interactions, *Atmos. Chem. Phys.*, 11(9), 4027–4037, doi:10.5194/acp-11-4027-2011, 2011.

Feingold, G., McComiskey, A., Rosenfeld, D. and Sorooshian, A.: On the relationship between cloud contact time and precipitation susceptibility to aerosol, *J. Geophys. Res. Atmos.*, 118(18), 10544–10554, doi:10.1002/jgrd.50819, 2013.

L’Ecuyer, T. S., Berg, W., Haynes, J., Lebsock, M. and Takemura, T.: Global observations of aerosol impacts on precipitation occurrence in warm maritime clouds, *J. Geophys. Res. Atmos.*, 114(9), 1–15, doi:10.1029/2008JD011273, 2009.

Lebo, Z. J. and Feingold, G.: On the relationship between responses in cloud water and precipitation to changes in aerosol, *Atmos. Chem. Phys.*, 14(21), 11817–11831, doi:10.5194/acp-14-11817-2014, 2014.

Michibata, T., Suzuki, K., Sato, Y. and Takemura, T.: The source of discrepancies in aerosol--cloud--precipitation interactions between GCM and A-Train retrievals, *Atmos. Chem. Phys.*, 16(23), 15413–15424, doi:10.5194/acp-16-15413-2016, 2016.

Twomey, S.: The Influence of Pollution on the Shortwave Albedo of Clouds, *J. Atmos. Sci.*, 34(7), 1149–1152, doi:10.1175/1520-0469(1977)034<1149:TIOPOT>2.0.CO;2, 1977.

Wang, M., Ghan, S., Liu, X., L’Ecuyer, T. S., Zhang, K., Morrison, H., Ovchinnikov, M., Easter, R., Marchand, R., Chand, D., Qian, Y. and Penner, J. E.: Constraining cloud lifetime effects of aerosols using A-Train satellite observations, *Geophys. Res. Lett.*, 39, L15709, doi:10.1029/2012GL052204, 2012.

Webb, M. J., Lock, A. P., Bretherton, C. S., Bony, S., Cole, J. N. S., Idelkadi, A., Kang, S. M., Koshiro, T., Kawai, H., Ogura, T., Roehrig, R., Shin, Y., Mauritsen, T., Sherwood, S. C., Vial, J., Watanabe, M., Woelfle, M. D. and Zhao, M.: The impact of parametrized convection on cloud feedback, *Philos. Trans. R. Soc. A Math. Phys. Eng. Sci.*, 373(2054), 20140414, doi:10.1098/rsta.2014.0414, 2015.

Wood, R.: Drizzle in Stratiform Boundary Layer Clouds. Part II: Microphysical Aspects, *J. Atmos. Sci.*, 62(9), 3034–3050, doi:10.1175/JAS3530.1, 2005.

Zhang, S., Wang, M., J. Ghan, S., Ding, A., Wang, H., Zhang, K., Neubauer, D., Lohmann, U., Ferrachat, S., Takeamura, T., Gettelman, A., Morrison, H., Lee, Y., T. Shindell, D., G. Partridge, D., Stier, P., Kipling, Z. and Fu, C.: On the characteristics of aerosol indirect effect based on dynamic regimes in global climate models, *Atmos. Chem. Phys.*, 16(5), 2765–2783, doi:10.5194/acp-16-2765-2016, 2016.

Zhang, Z. and Platnick, S.: An assessment of differences between cloud effective particle radius retrievals for marine water clouds from three MODIS spectral bands, *J. Geophys. Res. Atmos.*, 116(20), doi:10.1029/2011JD016216, 2011.
